# Supplementary material for: Effectiveness and safety of modified fully oral 9-month treatment regimens for rifampicin-resistant tuberculosis: a prospective cohort study
Source: PubMed Central journal article supplement (PMC11424498; doi:10.1016/s1473-3099(24)00228-7), 2024-10
Supplement: mmc2.pdf [file mmc2.pdf]

# THE LANCET

## Infectious Diseases

### Supplementary appendix 2

This appendix formed part of the original submission and has been peer reviewed. We post it as supplied by the authors.

Supplement to: Korotych O, Achar J, Gurbanova E, et al. Effectiveness and safety of modified fully oral 9-month treatment regimens for rifampicin-resistant tuberculosis: a prospective cohort study. *Lancet Infect Dis* 2024; published online June 13. [https://doi.org/10.1016/S1473-3099\(24\)00228-7](https://doi.org/10.1016/S1473-3099(24)00228-7).

**Figure 1. Kaplan Meier estimates for time to sputum culture conversion using Löwenstein-Jensen culture.**

| <b>Characteristic</b> | <b>Median, days</b> | <b>30 days</b> | <b>60 days</b> | <b>90 days</b> | <b>120 days</b> |
|-----------------------|---------------------|----------------|----------------|----------------|-----------------|
| Overall               | 57 (55, 59)         | 28% (26%, 30%) | 55% (53%, 57%) | 68% (66%, 70%) | 73% (70%, 75%)  |

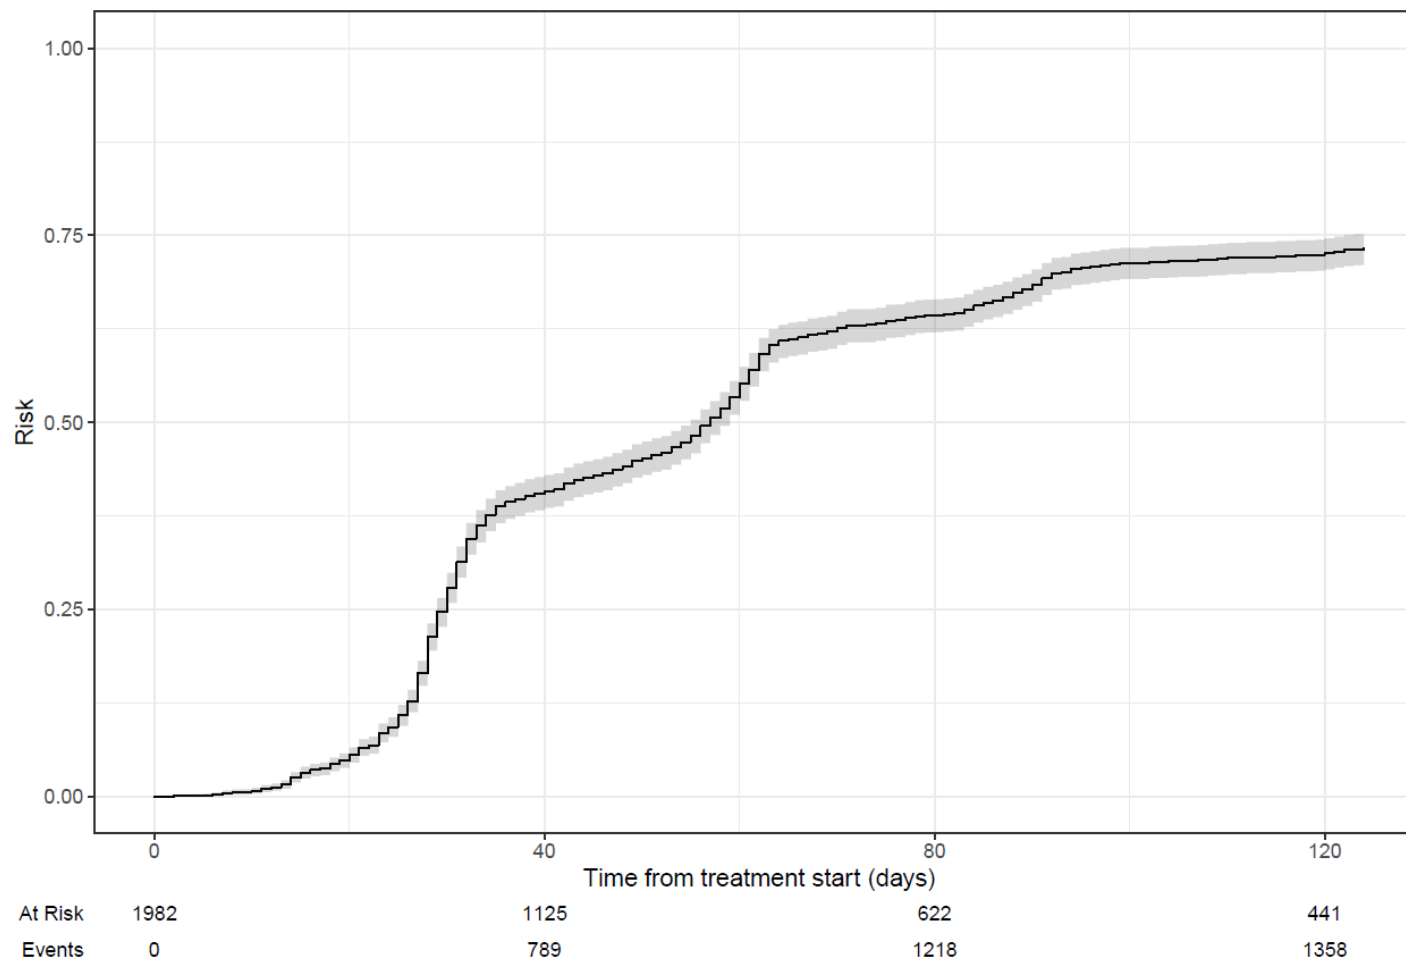

**Figure 2. Kaplan Meier estimates for time to sputum culture conversion using Mycobacterial Growth Inhibitor Tube culture.**

| <b>Characteristic</b> | <b>Median, days</b> | <b>30 days</b> | <b>60 days</b> | <b>90 days</b> | <b>120 days</b> |
|-----------------------|---------------------|----------------|----------------|----------------|-----------------|
| Overall               | 86 (71, 90)         | 19% (18%, 21%) | 41% (38%, 43%) | 53% (50%, 55%) | 58% (55%, 60%)  |

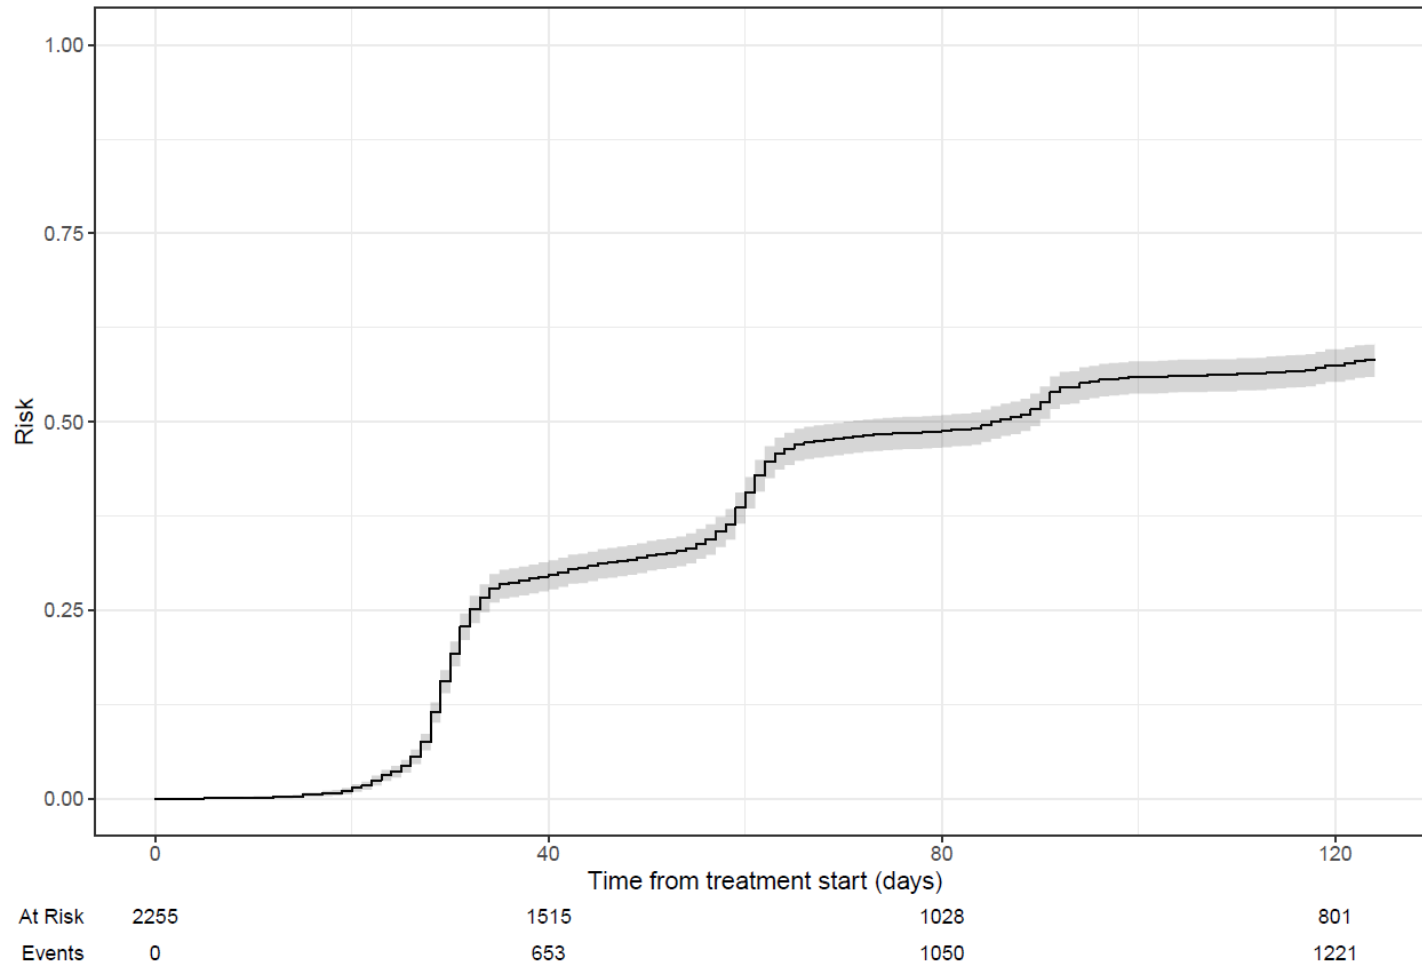

**Figure 3. Kaplan Meier estimates for time to sputum culture conversion using Mycobacterial Growth Inhibitor Tube and Löwenstein-Jensen cultures interchangeably.**

| Characteristic | Median, days | 30 days        | 60 days        | 90 days        | 120 days       |
|----------------|--------------|----------------|----------------|----------------|----------------|
| Overall        | 34 (33, 35)  | 37% (35%, 39%) | 72% (70%, 74%) | 89% (88%, 90%) | 95% (93%, 96%) |

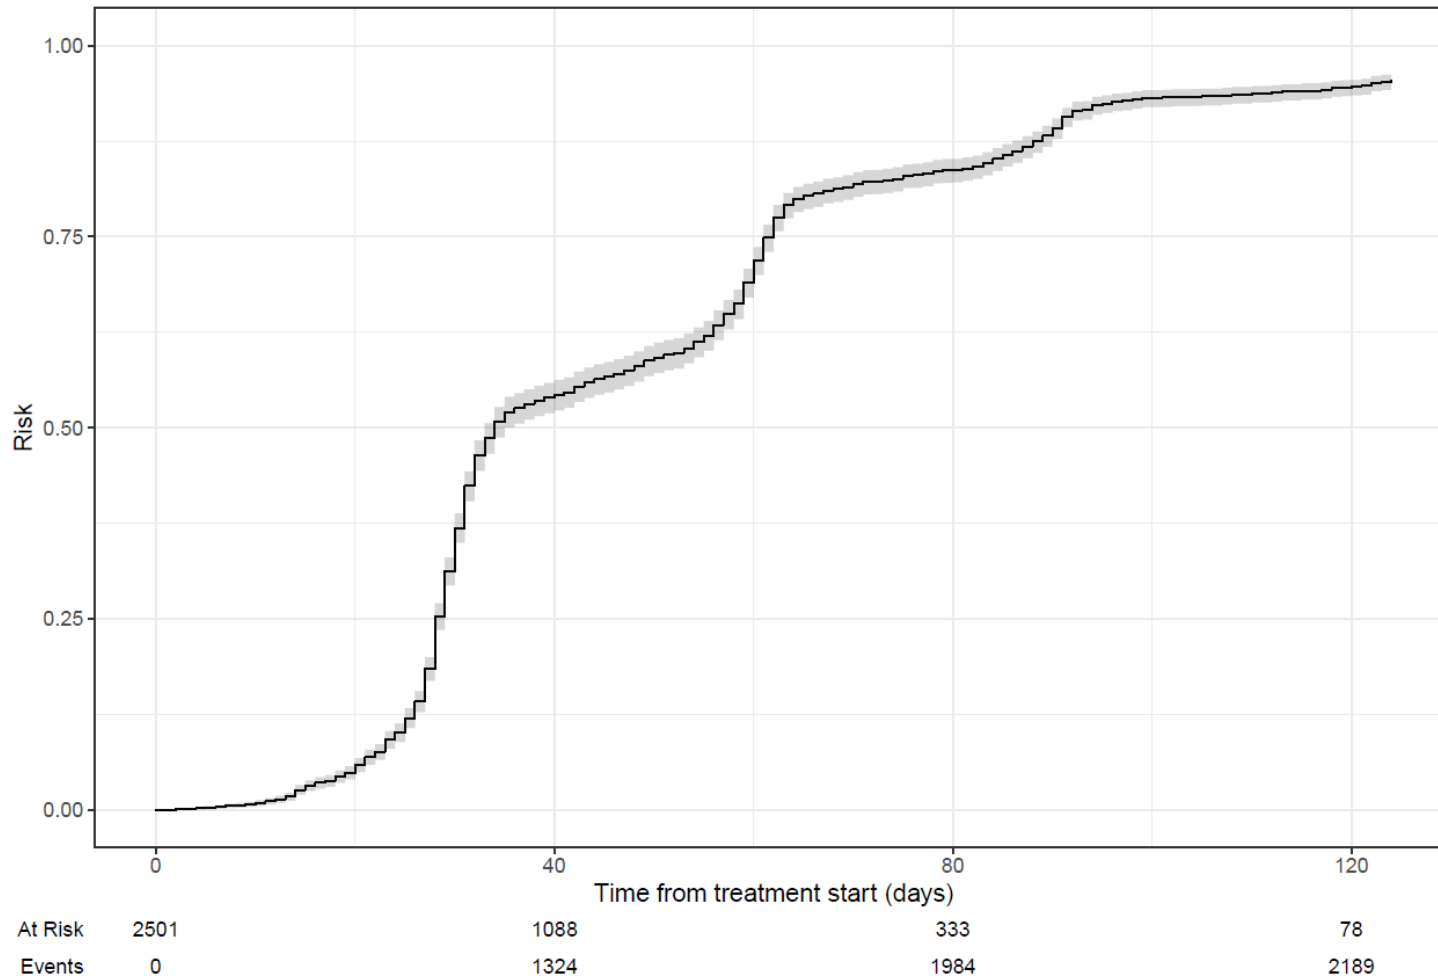

**Figure 4. Cumulative probability of remaining in the study after successful treatment outcomes**

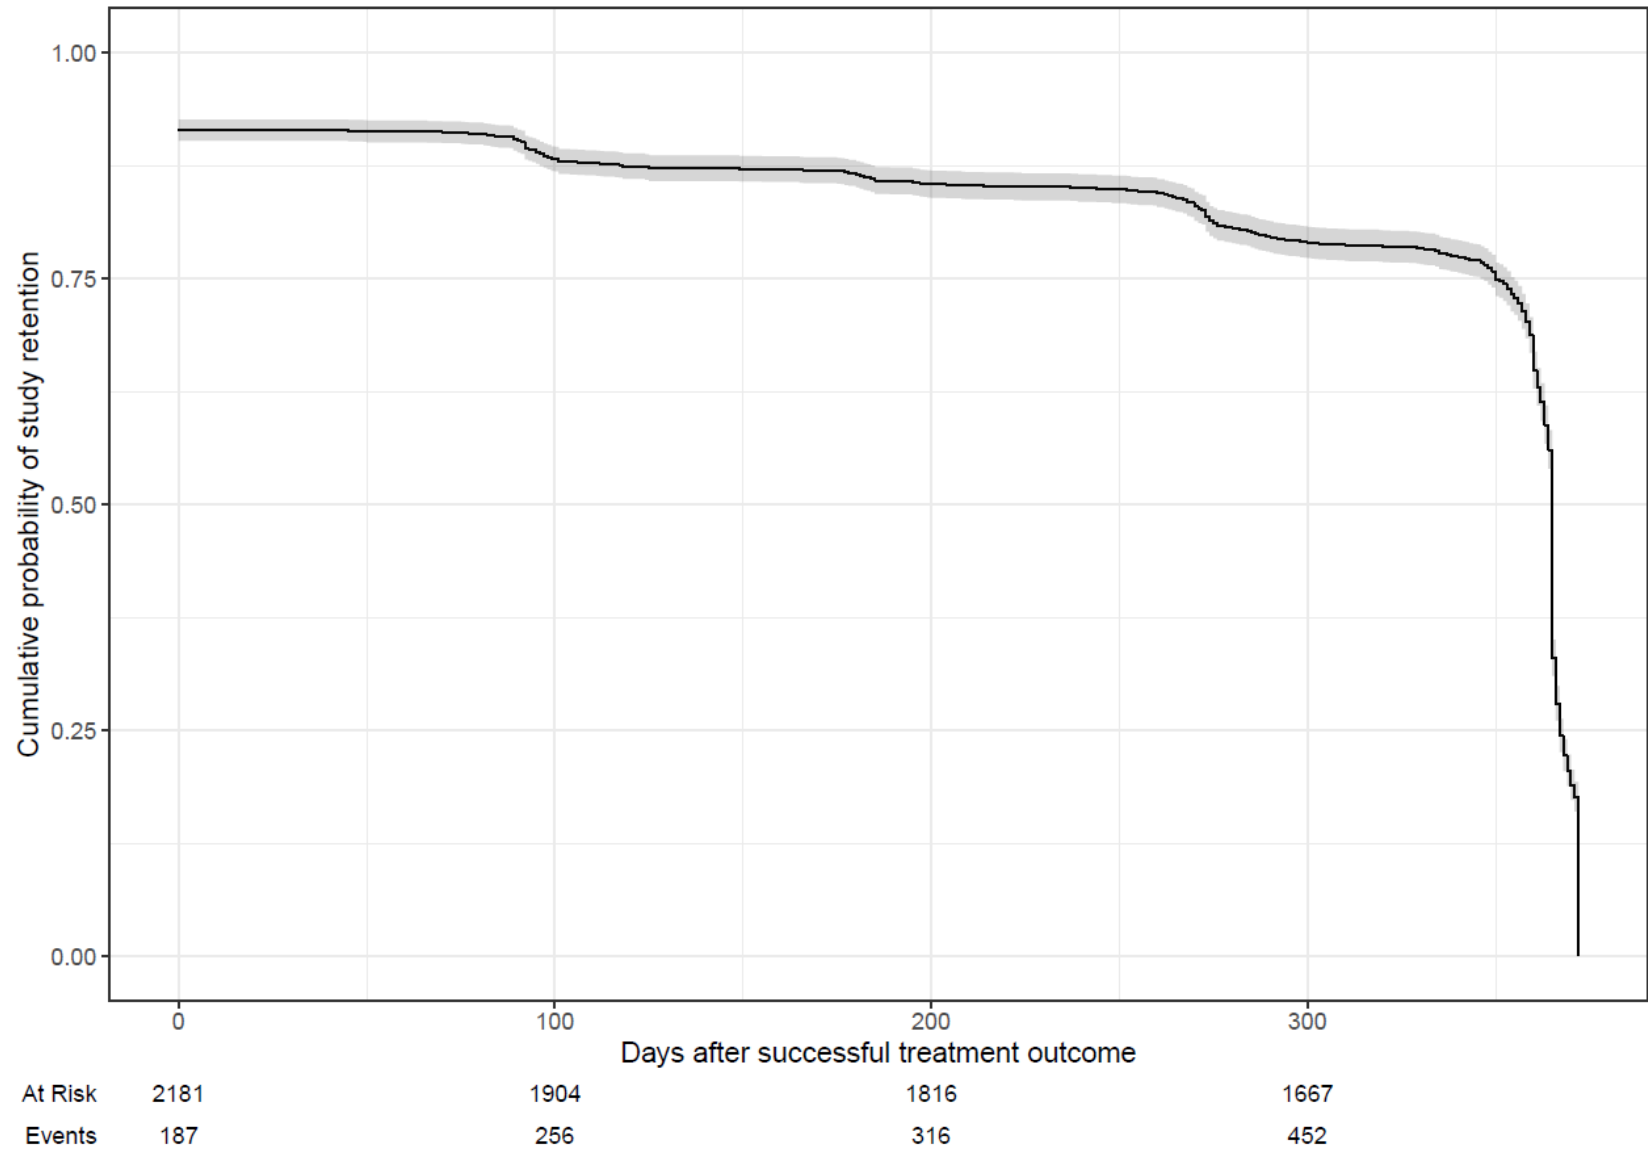

**Figure 5. Kaplan-Meier estimates for time to unsuccessful study outcome.**

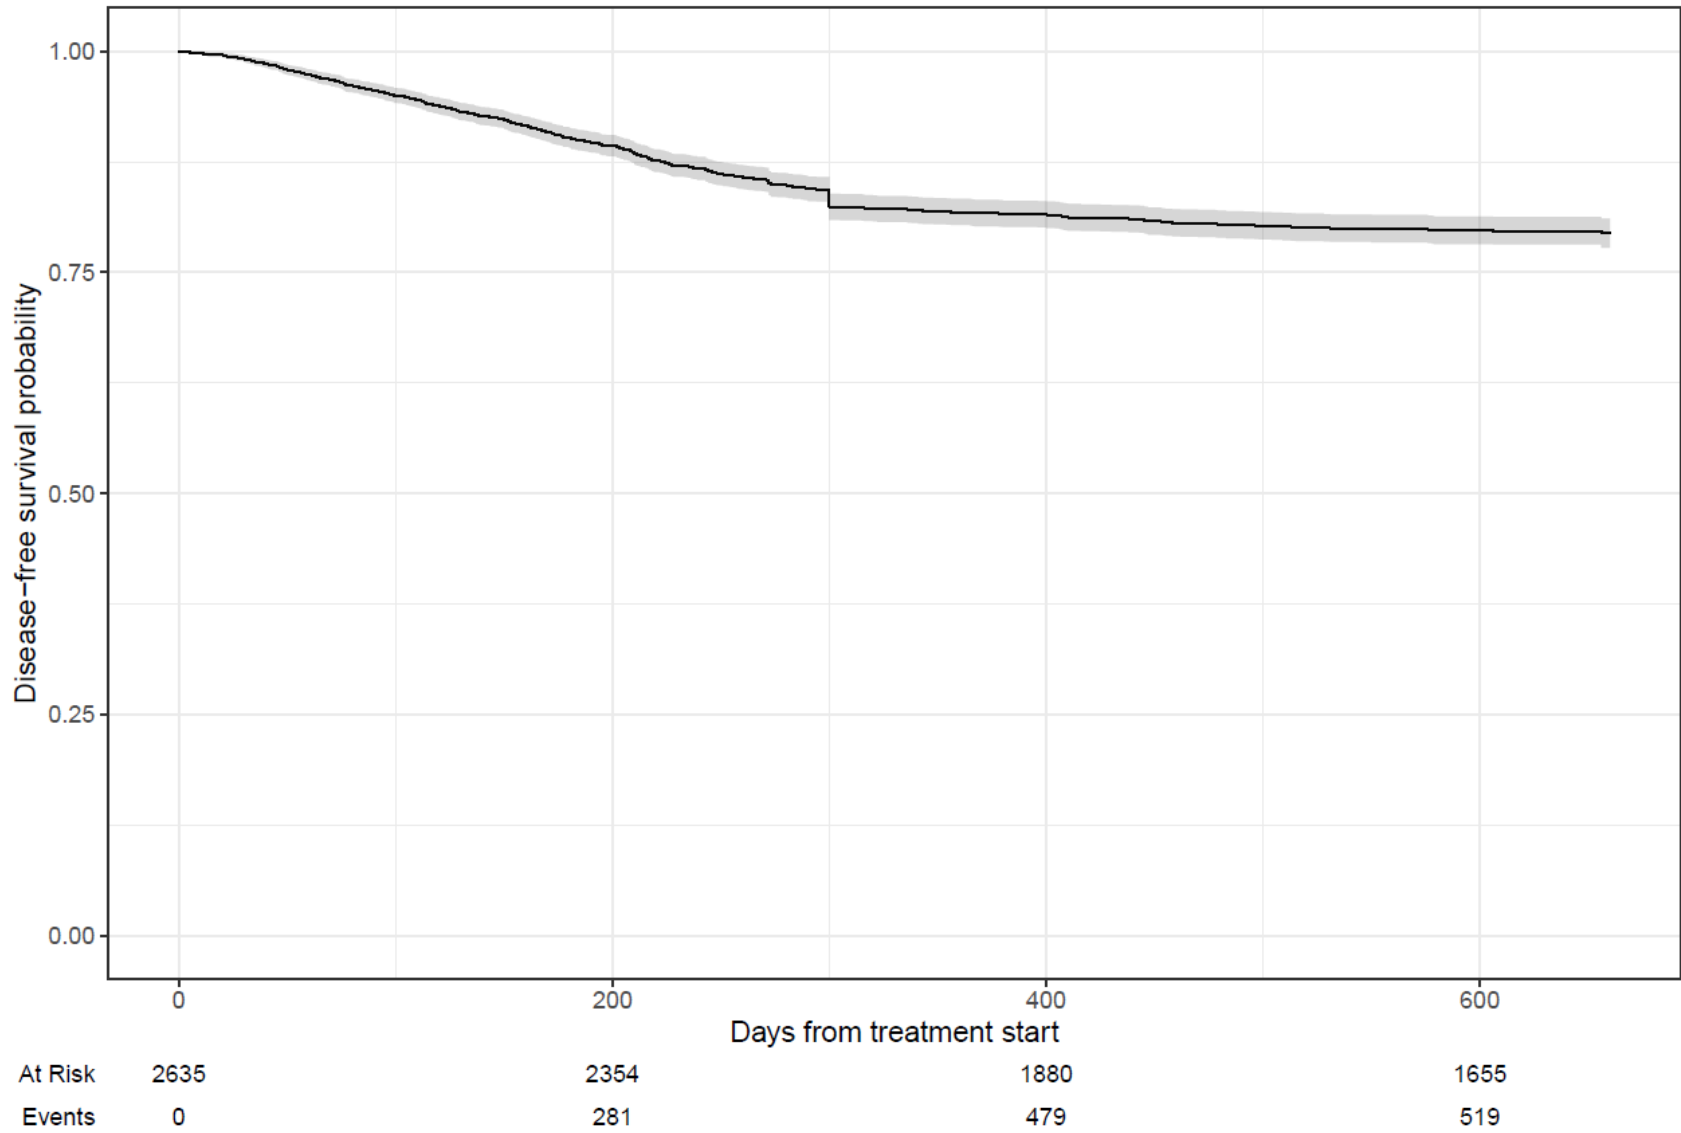

**Table 1. List of ethics review bodies that approved mSTR operational research in 2020-2021 and enrollment start dates.**

| <b>Country</b>    | <b>Name of IRB</b>                                                                                                                       | <b>Date of approval</b> | <b>Name of the Chairperson</b> | <b>Principal Investigator</b> | <b>Enrollment start dates</b> |
|-------------------|------------------------------------------------------------------------------------------------------------------------------------------|-------------------------|--------------------------------|-------------------------------|-------------------------------|
| <b>Armenia</b>    | Ethics Review Committee Healthcare Research & Development Initiative of Armenia                                                          | 5 May 2020              | Lilit Khachatryan              | Dr Naira Khachatryan          | 28 August 2020                |
| <b>Azerbaijan</b> | Ethics Review Committee of the Azerbaijan Medical Institute                                                                              | 18 May 2020             | Rauf Baylarov                  | Dr Irada Akhundova            | 26 October 2020               |
| <b>Belarus</b>    | Ethics Review Committee of the State Institution 'Republican Scientific-Practical Center of Pulmonology and Phthysiology'                | 10 December 2019        | T.M. Kritskaya                 | Prof Alena Skrahina           | 1 November 2020               |
| <b>Georgia</b>    | Ethics Committee of the National Center for Tuberculosis and Lung Diseases of Georgia                                                    | 18 September 2020       | Paata Aladashvili              | Prof Nana Kiria               | 4 February 2021               |
| <b>Kazakhstan</b> | Ethics Review Committee of the National Scientific Center for Phthysiopulmonology of the Republic of Kazakhstan                          | 11 September 2020       | G.A. Smailova                  | Dr Malik Adenov               | 12 October 2020               |
| <b>Kyrgyzstan</b> | Ethics Committee of the Scientific and Production Center for Preventive Medicine of the Ministry of Health of the Republic of Kyrgyzstan | 21 December 2020        | D.A. Baiyzbekova               | Dr Marat Abdiev               | 17 February 2021              |
| <b>Latvia</b>     | Riga Stradins University Ethics Review Committee                                                                                         | 10 September 2020       | Olaf Bruvers                   | Dr Liga Kuksa                 | 10 March 2021                 |
| <b>Lithuania</b>  | Kaunas Regional Biomedical Research Ethics Committee                                                                                     | 8 January 2021          | Gintautas Gumbrevičius         | Dr Saulius Diktanas           | 25 May 2021                   |

|                            |                                                                                                                                                                              |                   |                    |                      |                   |
|----------------------------|------------------------------------------------------------------------------------------------------------------------------------------------------------------------------|-------------------|--------------------|----------------------|-------------------|
| <b>Republic of Moldova</b> | Committee of Biomedical Ethic of Public Medical Sanitary Institute of Phthisiopneumology "Chiril Draganiuc"                                                                  | 15 May 2020       | Valeriu Djugostran | Dr Valentina Vilc    | 15 September 2020 |
| <b>Tajikistan</b>          | Biomedical Ethics Committee of the Ministry of Health and Social Protection of Republic of Tajikistan, Academy of Medical Sciences                                           | 16 September 2020 | M.S. Rustamova     | Dr Sadullo Saidaliev | 4 December 2020   |
| <b>Turkmenistan</b>        | Local Ethics Review Committee at the Centers for Infectious Diseases Directorate, Ministry of Health and Medical Industry of Turkmenistan                                    | 3 November 2020   | B. Jumayev         | Dr Mahri Durdyeva    | 1 February 2021   |
| <b>Ukraine</b>             | Committee on Medical Ethics State Institution "National institute of phthysiology and pulmonology named after F. G. Yanovsky, National Academy of Medical Science of Ukraine | 14 August 2020    | V.I. Korzhov       | Dr Iana Terleieva    | 1 November 2020   |
| <b>Uzbekistan</b>          | Ethical Committee of the Ministry of Health of Republic of Uzbekistan                                                                                                        | 12 June 2020      | U.K. Kayumov       | Dr Nargiza Parpiyeva | 19 November 2020  |

IRB = Institutional Review Board



**Table 2. Dosing of medicines used in MDR/RR-TB regimens by weight band in patients older than 14 yearsa.**

| Group | Medicine                  | Weight-based daily dose | Formulation | Weight bands for patients older than 14 years <sup>a</sup>     |          |          |          |        | Usual upper daily dose <sup>b</sup> |
|-------|---------------------------|-------------------------|-------------|----------------------------------------------------------------|----------|----------|----------|--------|-------------------------------------|
|       |                           |                         |             | 30–35 kg                                                       | 36–45 kg | 46–55 kg | 56–70 kg | >70 kg |                                     |
| A     | Levofloxacin              | - <sup>c</sup>          | 250 mg tab  | 3                                                              | 3        | 4        | 4        | 4      | 1.5 g                               |
|       |                           |                         | 500 mg tab  | 1.5                                                            | 1.5      | 2        | 2        | 2      |                                     |
|       |                           |                         | 750 mg tab  | 1                                                              | 1        | 1.5      | 1.5      | 1.5    |                                     |
| A     | Bedaquiline               | - <sup>c</sup>          | 100 mg tab  | 4 tabs od for first 2 weeks; then 2 tabs od M/W/F for 22 weeks |          |          |          |        | 400 mg                              |
|       | Linezolid                 | - <sup>c</sup>          | 600 mg tab  | (<15 y)                                                        | (<15 y)  | 1        | 1        | 1      | 1.2 g                               |
| B     | Clofazimine               | - <sup>c</sup>          | 50 mg cap   | 2                                                              | 2        | 2        | 2        | 2      | 100 mg                              |
|       |                           |                         | 100 mg cap  | 1                                                              | 1        | 1        | 1        | 1      | 100 mg                              |
|       | Cycloserine or terizidone | 10–15 mg/kg             | 250 mg cap  | 2                                                              | 2        | 3        | 3        | 3      | 1 g                                 |
| C     | Delamanid                 | - <sup>c</sup>          | 50 mg tab   | 2 bd                                                           | 2 bd     | 2 bd     | 2 bd     | 2 bd   | 200 mg                              |

bd = two times a day; cap = capsule; g = gram; kg = kilogram; mg = milligram; M/W/F = Monday, Wednesday, Friday; tab = tablet; y=year

*Footnotes*

- <sup>a</sup> Dosages were established by the Guideline Development Group for the *WHO treatment guidelines for rifampicin- and multidrug-resistant tuberculosis, 2018 update* and the WHO Global task force on the pharmacokinetics and pharmacodynamics (PK/PD) of TB medicines and other experts. They are based on the most recent reviews and best practices in the treatment of MDR/RR-TB. For certain agents the dosages were informed by pharmacokinetic modelling results based on the principle of allometric scaling (Anderson BJ, Holford NH. Mechanism-based concepts of size and maturity in pharmacokinetics. *Annu Rev Pharmacol Toxicol* 2008;48:303–32). Due to the pharmacokinetic properties of certain medicines the doses proposed may exceed the mg/kg/day ranges shown here in order to achieve blood concentrations similar to target levels in an average adult patient. In patients <30 kg follow the schedule for <15 year olds unless otherwise indicated. If multiple dose options are given for one weight band select the lower or higher option depending on whether the patient is at the lower or higher limit of the body weight range. Dosing more closely to the target mg/kg/day should be aimed for, and is more feasible with oral or parenteral fluids and when solid forms of different dosages are available. Fractioning of tablets into halves or less should be avoided, if possible. Therapeutic drug monitoring is advised when the dose is at the upper and lower ends of the range to minimize the adverse therapeutic consequences of over- and under-exposure, respectively (especially for injectable agents, linezolid and fluoroquinolones).
- <sup>b</sup> Clinicians may decide to exceed these values in particular cases to improve therapeutic effect.
- <sup>c</sup> No weight-based dosing is proposed.



**Table 3. Dosing of medicines used in MDR-TB regimens by weight band in patients under 15 years<sup>a</sup>**

| Group                     | Medicine                                          | Weight-based daily dose <sup>b</sup>                         | Formulation         | Weight bands among patients not yet 15 years old <sup>a</sup> |                      |                |                                                           |          |                                                          |         | Usual upper daily dose <sup>b</sup> | Comments                                                |
|---------------------------|---------------------------------------------------|--------------------------------------------------------------|---------------------|---------------------------------------------------------------|----------------------|----------------|-----------------------------------------------------------|----------|----------------------------------------------------------|---------|-------------------------------------|---------------------------------------------------------|
|                           |                                                   |                                                              |                     | 5–6 kg                                                        | 7–9 kg               | 10–15 kg       | 16–23 kg                                                  | 24–30 kg | 31–34 kg                                                 | >34 kg  |                                     |                                                         |
| A                         | Levofloxacin                                      | 15–20 mg/kg                                                  | 100 mg dt           | 1                                                             | 1.5                  | 2 or 3         | 3 or 4                                                    | (>14 y)  | (>14 y)                                                  | (>14 y) | 1.5 g                               |                                                         |
|                           |                                                   |                                                              | 250 mg tab          | 0.5                                                           | 0.5                  | 1 or 1.5       | 1.5 or 2                                                  | 2        | 3                                                        | (>14 y) | 1.5 g                               |                                                         |
|                           | Bedaquiline                                       | -                                                            | 100 mg tab          | -                                                             | -                    | -              | 2 tabs od for two weeks; then 1 tab od M/W/F for 22 weeks |          | 4 tabs od for 2 weeks; then 2 tabs od M/W/F for 22 weeks |         | -                                   |                                                         |
| Linezolid                 | 15 mg/kg od in <16 kg<br>10–12 mg/kg od in >15 kg | 20 mg /ml susp<br>600 mg tab <sup>c</sup>                    | 4 ml                | 6 ml                                                          | 8 ml                 | 11 ml          | 14 ml                                                     | 15 ml    | 20 ml <sup>d</sup>                                       | 600 mg  |                                     |                                                         |
|                           |                                                   |                                                              | 0.25                | 0.25                                                          | 0.25                 | 0.5            | 0.5                                                       | 0.5      | 0.75 <sup>d</sup>                                        |         |                                     |                                                         |
| B                         | Clofazimine                                       | 2–5 mg/kg                                                    | 50 mg cap           | 1 alt days                                                    | 1 alt days           | 1 alt days     | 1                                                         | 2        | 2                                                        | (>14 y) | 100 mg                              | Give on alternate days if dose in mg/kg/day is too high |
|                           |                                                   |                                                              | 100 mg cap          | M/W/F                                                         | M/W/F                | 1 alt days     | 1 alt days                                                | 1        | (>14 y)                                                  | (>14 y) | 100 mg                              |                                                         |
| Cycloserine or terizidone | 15–20 mg/kg                                       | 125 mg mini capsule (cycloserine)<br>250 mg cap <sup>c</sup> | 1                   | 1                                                             | 2                    | 3              | 4                                                         | (>14 y)  | (>14 y)                                                  | 1 g     |                                     |                                                         |
|                           |                                                   |                                                              | 4–5 ml <sup>c</sup> | 5–6 ml <sup>c</sup>                                           | 7–10 ml <sup>c</sup> | 2              | 2                                                         | 2        | (>14 y)                                                  | 1 g     |                                     |                                                         |
| C                         | Delamanid                                         | -                                                            | 50 mg tab           | -                                                             | - <sup>e</sup>       | - <sup>e</sup> | - <sup>e</sup>                                            | 1 bd     | 1 bd                                                     | 2 bd    | 200 mg                              | Only in patients >2 years old (25 mg bd in              |

|  |  |  |  |  |  |                                                              |
|--|--|--|--|--|--|--------------------------------------------------------------|
|  |  |  |  |  |  | 3–5 years; 50 mg bd in 6–11 years; 100 mg bd in 12–17 years) |
|--|--|--|--|--|--|--------------------------------------------------------------|

alt=alternate; bd = two times a day; cap = capsule; dt = dispersible tablet; g = gram; kg = kilogram; ml = millilitre; mg = milligram; M/W/F = Monday, Wednesday, Friday; susp = suspension; tab = tablet; y=year

### Footnotes

- a Dosages were established by the Guideline Development Group for the *WHO treatment guidelines for rifampicin- and multidrug-resistant tuberculosis, 2018 update* and the WHO Global task force on the pharmacokinetics and pharmacodynamics (PK/PD) of TB medicines and other experts. They are based on the most recent reviews and best practices in the treatment of MDR/RR-TB. For certain agents the dosages were informed by pharmacokinetic modelling results based on the principle of allometric scaling (Anderson BJ, Holford NH. Mechanism-based concepts of size and maturity in pharmacokinetics. *Annu Rev Pharmacol Toxicol* 2008;48:303–32). Due to the pharmacokinetic properties of certain medicines the doses proposed may exceed the mg/kg/day ranges shown here in order to achieve blood concentrations similar to target levels in an average adult patient. In patients >30 kg follow the schedule for >14 year olds unless otherwise indicated. If multiple dose options are given for one weight band select the lower or higher option depending on whether the patient is at the lower or higher limit of the body weight range. Dosing more closely to the target mg/kg/day should be aimed for, and is more feasible with oral or parenteral fluids and when solid forms of different dosage are available. Fractioning of tablets into halves or less should be avoided if possible. Therapeutic drug monitoring is advised when the dose is at the upper and lower ends of the range to minimize the adverse therapeutic consequences of over- and under-exposure respectively (especially for injectable agents, linezolid and fluoroquinolones).
- b Clinicians may decide to exceed these values in particular cases to improve therapeutic effect.
- c Dissolving in 10 ml of water may facilitate administration in patients in lower weight-bands and avoids fractioning solid formulations, although bioavailability is uncertain (use of dispersible tablets is preferred if available).
- d In individuals >44 kg a dose of 600 mg od is proposed.

**Table 4. Clinical and bacteriological monitoring schedule for MDR/RR-TB patients on mSTR.**

|                                            | Baseline Visit | Week 2 | Month 1 | Month 2                                                             | Month 3 | Month 4 | Month 5 | Month 6 | Until end of treatment               | End of treatment | 3 months post-end-of-treatment | 6 months post-end-of-treatment | 9 months post-end-of-treatment | 12 months post-end-of-treatment |
|--------------------------------------------|----------------|--------|---------|---------------------------------------------------------------------|---------|---------|---------|---------|--------------------------------------|------------------|--------------------------------|--------------------------------|--------------------------------|---------------------------------|
| <i>Clinical evaluation</i>                 |                |        |         |                                                                     |         |         |         |         |                                      |                  |                                |                                |                                |                                 |
| Vital signs                                | x              |        | x       | x                                                                   | x       | x       | x       | x       | Monthly                              | x                | x                              | x                              | x                              | x                               |
| Brief peripheral neuropathy screen         | x              |        | x       | x                                                                   | x       | x       | x       | x       | Monthly                              | x                |                                |                                |                                | x                               |
| Visual acuity and colorblindness screen    | x              |        | x       | x                                                                   | x       | x       | x       | x       | Monthly                              | x                |                                |                                |                                | x                               |
| Post-end-of- treatment consultation        |                |        |         |                                                                     |         |         |         |         |                                      | x                | x                              | x                              | x                              | x                               |
| Assessment and follow-up of adverse events | x              | x      | x       | x                                                                   | x       | x       | x       | x       | At each scheduled /unscheduled visit | x                | x                              | x                              | x                              | x                               |
| Weight                                     | x              | x      | x       | x                                                                   | x       | x       | x       | x       | Monthly                              | x                | x                              | x                              | x                              | x                               |
| <i>Bacteriological testing</i>             |                |        |         |                                                                     |         |         |         |         |                                      |                  |                                |                                |                                |                                 |
| Smear                                      | x              |        | x       | x                                                                   | x       | x       | x       | x       | Monthly                              | x                |                                | x                              |                                | x                               |
| Culture                                    | x              |        | x       | x                                                                   | x       | x       | x       | x       | Monthly                              | x                |                                | x                              |                                | x                               |
| Freeze baseline culture                    | x              |        |         |                                                                     |         |         |         |         |                                      |                  |                                |                                |                                |                                 |
| Xpert MTB/RIF                              | x              |        |         |                                                                     |         |         |         |         |                                      |                  |                                |                                |                                |                                 |
| LPA (Hain GenoType MTBDRsl)                | x              |        |         | If smear- or culture-positive check for amplification of resistance |         |         |         |         |                                      |                  |                                |                                |                                |                                 |
| Culture-based first-line DST               | x              |        |         | If smear- or culture-positive check for amplification of resistance |         |         |         |         |                                      |                  |                                |                                |                                |                                 |
| Culture-based second-line DST              | x              |        |         | If smear- or culture-positive check for amplification of resistance |         |         |         |         |                                      |                  |                                |                                |                                |                                 |

|                                                                                           | Baseline Visit | Week 2                                            | Month 1 | Month 2 | Month 3 | Month 4 | Month 5 | Month 6 | Until end of treatment | End of treatment | 3 months post-end-of-treatment | 6 months post-end-of-treatment | 9 months post-end-of-treatment | 12 months post-end-of-treatment |
|-------------------------------------------------------------------------------------------|----------------|---------------------------------------------------|---------|---------|---------|---------|---------|---------|------------------------|------------------|--------------------------------|--------------------------------|--------------------------------|---------------------------------|
| <i>Laboratory testing</i>                                                                 |                |                                                   |         |         |         |         |         |         |                        |                  |                                |                                |                                |                                 |
| ECG                                                                                       | x              | x                                                 | x       | x       | x       | x       | x       | x       | Monthly                | x                | x                              | x                              |                                |                                 |
| Full blood count (hemoglobin, red blood cells, white blood cells and platelets) if on Lzd | x              |                                                   | x       | x       | x       | x       | x       | x       | Monthly (if on Lzd)    | x                |                                |                                |                                |                                 |
| Liver function tests (AST, ALT)                                                           | x              |                                                   | x       | x       | x       | x       | x       | x       | Monthly                | x                |                                |                                |                                |                                 |
| Serum creatinine                                                                          | x              |                                                   | x       | x       | x       | x       | x       | x       | Monthly                | x                |                                |                                |                                |                                 |
| Serum potassium                                                                           | x              |                                                   | x       | x       | x       | x       | x       | x       | Monthly                | x                |                                |                                |                                |                                 |
| Hepatitis Bs Antigen                                                                      | x              |                                                   |         |         |         |         |         |         |                        |                  |                                |                                |                                |                                 |
| Hepatitis C Antibody                                                                      | x              |                                                   |         |         |         |         |         |         |                        |                  |                                |                                |                                |                                 |
| HbA1c                                                                                     | x              | Repeated every 3 months if elevated               |         |         |         |         |         |         |                        |                  |                                |                                |                                |                                 |
| COVID-19 PCR                                                                              | x              | At baseline and then only if clinically indicated |         |         |         |         |         |         |                        |                  |                                |                                |                                |                                 |
| Pregnancy test (females)                                                                  | x              |                                                   |         |         |         |         |         |         |                        |                  |                                |                                |                                |                                 |
| HIV testing                                                                               | x              |                                                   |         |         |         |         |         |         |                        |                  |                                |                                |                                |                                 |
| CD4 (repeated every 6 months if HIV+)                                                     | x              |                                                   |         |         |         |         |         | x       |                        |                  |                                |                                |                                |                                 |
| HIV Viral load (repeated every 6 months if HIV+)                                          | x              |                                                   |         |         |         |         |         | x       |                        |                  |                                |                                |                                |                                 |
| Chest X-Ray                                                                               | x              |                                                   |         |         |         |         |         | x       |                        | x                |                                |                                |                                |                                 |

LPA= line probe assay; DST=drug sensitivity test; ECG=electrocardiogram; Lzd=linezolid; ALT=alanine aminotransferase. AST=aspartate aminotransferase; HbA1c=HbA1c; PCR=Polymerase chain reaction; HIV=human immunodeficiency virus.

**Table 5. Key definitions used in the operational research on mSTR.**

| <b>EVENT</b>                                  | <b>DEFINITION</b>                                                                                                                                                                                                                                                                                                                                                                                                                                                                                                                                                                                                                                                                                                                                                                                                                                    |
|-----------------------------------------------|------------------------------------------------------------------------------------------------------------------------------------------------------------------------------------------------------------------------------------------------------------------------------------------------------------------------------------------------------------------------------------------------------------------------------------------------------------------------------------------------------------------------------------------------------------------------------------------------------------------------------------------------------------------------------------------------------------------------------------------------------------------------------------------------------------------------------------------------------|
| <b>Cured</b>                                  | A patient with bacteriologically confirmed RR-TB who has completed treatment as recommended by this protocol without evidence of failure AND at least three or more consecutive cultures taken at least 30 days apart are negative at the end of treatment                                                                                                                                                                                                                                                                                                                                                                                                                                                                                                                                                                                           |
| <b>Treatment completed</b>                    | Treatment completed as recommended by this protocol without evidence of failure BUT no record that three or more consecutive cultures taken at least 30 days apart are negative at the end of treatment                                                                                                                                                                                                                                                                                                                                                                                                                                                                                                                                                                                                                                              |
| <b>Treatment failed</b>                       | Treatment terminated or need for permanent regimen change of at least two anti-TB drugs because of: <ul style="list-style-type: none"> <li>• lack of sputum culture conversion after 4 months of treatment, or</li> <li>• bacteriological reversion of sputum culture after 5 months of treatment in a patient with previous culture conversion to negative, or</li> <li>• evidence of additional acquired resistance to fluoroquinolones, Bdq, Dlm, Lzd, Cfz, or</li> <li>• adverse drug reactions (leading to the change of at least two anti-TB drugs in the regimen)</li> <li>• failed to receive 246-301 doses of treatment regimen within up to 43 weeks regardless of the reason (unless they satisfied the definition of lost to follow-up)</li> <li>• received more than 301 doses of treatment regimen regardless of the reason</li> </ul> |
| <b>Died</b>                                   | A patient who dies for any reason during the course of treatment and 12 months follow-up period                                                                                                                                                                                                                                                                                                                                                                                                                                                                                                                                                                                                                                                                                                                                                      |
| <b>Lost to follow-up</b>                      | A patient whose treatment was interrupted for 2 consecutive months or more                                                                                                                                                                                                                                                                                                                                                                                                                                                                                                                                                                                                                                                                                                                                                                           |
| <b>Not evaluated for end of study outcome</b> | A patient whose sustained treatment success was not evaluated at 12 months of follow-up                                                                                                                                                                                                                                                                                                                                                                                                                                                                                                                                                                                                                                                                                                                                                              |
| <b>Withdrawn</b>                              | A patient is taken off the mSTR for any reason other than treatment failure (for example, baseline second-line drug resistance, withdrawn patient informed consent, or other reasons) and referred to the PMDT programme for routine care                                                                                                                                                                                                                                                                                                                                                                                                                                                                                                                                                                                                            |
| <b>Treatment success</b>                      | The sum of <i>cured</i> and <i>treatment completed</i>                                                                                                                                                                                                                                                                                                                                                                                                                                                                                                                                                                                                                                                                                                                                                                                               |
| <b>Recurrence</b>                             | Cure or treatment completion with two consecutive positive cultures during post-treatment follow-up, or one positive culture with clinical signs and symptoms or radiographic deterioration, but without genotyping information on baseline and recurrent strain                                                                                                                                                                                                                                                                                                                                                                                                                                                                                                                                                                                     |
| <b>Conversion (to negative)</b>               | Culture is considered to have converted to negative when two consecutive cultures taken at least 30 days apart are found to be negative. In such case, the specimen collection date of the first negative culture is used as the date of conversion.                                                                                                                                                                                                                                                                                                                                                                                                                                                                                                                                                                                                 |

TB=tuberculosis; RR-TB=rifampicin-resistant TB, Bdq=bedaquiline; Cfz=clofazimine; Dlm=delamanid; Lzd=linezolid; mSTR=modified short treatment regimens; PMDT= programmatic management of drug-resistant TB.

**Table 6. Participants' baseline demographic and clinical characteristics by each study regimen.**

| <b>Characteristic</b>                     | <b>Lfx + Bdq + Lzd + Cfz + Cs,<br/>N = 2532<sup>1</sup></b> | <b>Lfx + Bdq + Lzd + Cfz + Dlm,<br/>N = 75<sup>1</sup></b> | <b>Lfx + Dlm + Lzd + Cfz,<br/>N = 29<sup>1</sup></b> |
|-------------------------------------------|-------------------------------------------------------------|------------------------------------------------------------|------------------------------------------------------|
| <b>Age (yrs)</b>                          | 43 (34, 53)                                                 | 41 (34, 53)                                                | 6 (4, 10)                                            |
| <b>Age group (yrs)</b>                    |                                                             |                                                            |                                                      |
| <15                                       | 19 (0.8%)                                                   | 1 (1.3%)                                                   | 27 (93.1%)                                           |
| 15-24                                     | 188 (7.4%)                                                  | 4 (5.3%)                                                   | 2 (6.9%)                                             |
| 35-44                                     | 700 (27.6%)                                                 | 25 (33.3%)                                                 | 0 (0.0%)                                             |
| 45-54                                     | 578 (22.8%)                                                 | 14 (18.7%)                                                 | 0 (0.0%)                                             |
| 55-64                                     | 419 (16.5%)                                                 | 10 (13.3%)                                                 | 0 (0.0%)                                             |
| >64                                       | 147 (5.8%)                                                  | 4 (5.3%)                                                   | 0 (0.0%)                                             |
| <b>Sex</b>                                |                                                             |                                                            |                                                      |
| Male                                      | 1899 (75.0%)                                                | 49 (65.3%)                                                 | 18 (62.1%)                                           |
| Female                                    | 633 (25.0%)                                                 | 26 (34.7%)                                                 | 11 (37.9%)                                           |
| <b>Body Mass Index (kg/m<sup>2</sup>)</b> |                                                             |                                                            |                                                      |
| <18.5                                     | 538 (21.2%)                                                 | 16 (21.3%)                                                 | 26 (89.7%)                                           |
| ≥18.5                                     | 1994 (78.8%)                                                | 59 (78.7%)                                                 | 3 (10.3%)                                            |
| <b>Country</b>                            |                                                             |                                                            |                                                      |
| Armenia                                   | 25 (1.0%)                                                   | 3 (4.0%)                                                   | 0 (0.0%)                                             |
| Azerbaijan                                | 101 (4.0%)                                                  | 0 (0.0%)                                                   | 0 (0.0%)                                             |
| Belarus                                   | 535 (21.1%)                                                 | 5 (6.7%)                                                   | 0 (0.0%)                                             |
| Georgia                                   | 96 (3.8%)                                                   | 3 (4.0%)                                                   | 1 (3.4%)                                             |
| Kazakhstan                                | 145 (5.7%)                                                  | 3 (4.0%)                                                   | 0 (0.0%)                                             |
| Kyrgyzstan                                | 82 (3.2%)                                                   | 0 (0.0%)                                                   | 11 (37.9%)                                           |
| Latvia                                    | 16 (0.6%)                                                   | 1 (1.3%)                                                   | 0 (0.0%)                                             |
| Lithuania                                 | 8 (0.3%)                                                    | 0 (0.0%)                                                   | 0 (0.0%)                                             |
| Republic of Moldova                       | 103 (4.1%)                                                  | 1 (1.3%)                                                   | 0 (0.0%)                                             |
| Tajikistan                                | 97 (3.8%)                                                   | 0 (0.0%)                                                   | 5 (17.2%)                                            |
| Turkmenistan                              | 107 (4.2%)                                                  | 1 (1.3%)                                                   | 0 (0.0%)                                             |
| Ukraine                                   | 1029 (40.6%)                                                | 58 (77.3%)                                                 | 11 (37.9%)                                           |
| Uzbekistan                                | 188 (7.4%)                                                  | 0 (0.0%)                                                   | 1 (3.4%)                                             |
| <b>Inclusion cohort</b>                   |                                                             |                                                            |                                                      |



| <b>Characteristic</b>                | <b>Lfx + Bdq + Lzd + Cfz + Cs,<br/>N = 2532<sup>1</sup></b> | <b>Lfx + Bdq + Lzd + Cfz + Dlm,<br/>N = 75<sup>1</sup></b> | <b>Lfx + Dlm + Lzd + Cfz,<br/>N = 29<sup>1</sup></b> |
|--------------------------------------|-------------------------------------------------------------|------------------------------------------------------------|------------------------------------------------------|
| Historical                           | 324 (12.8%)                                                 | 8 (10.6%)                                                  | 1 (3.4%)                                             |
| Prospective                          | 2208 (87.2%)                                                | 67 (88.4%)                                                 | 28 (96.6%)                                           |
| <b>History of injecting drug use</b> |                                                             |                                                            |                                                      |
| No                                   | 2450 (97.3%)                                                | 71 (95.9%)                                                 | 29 (100.0%)                                          |
| Yes                                  | 68 (2.7%)                                                   | 3 (4.1%)                                                   | 0 (0.0%)                                             |
| Missing                              | 14                                                          | 1                                                          | 0                                                    |
| <b>Homeless</b>                      |                                                             |                                                            |                                                      |
| No                                   | 2,454 (97.3%)                                               | 72 (96.0%)                                                 | 29 (100.0%)                                          |
| Yes                                  | 67 (2.7%)                                                   | 3 (4.0%)                                                   | 0 (0.0%)                                             |
| Missing                              | 11                                                          | 0                                                          | 0                                                    |
| <b>Employment status</b>             |                                                             |                                                            |                                                      |
| Employed                             | 568 (22.4%)                                                 | 25 (33.3%)                                                 | 0 (0.0%)                                             |
| Unemployed                           | 1562 (61.7%)                                                | 41 (54.7%)                                                 | 0 (0.0%)                                             |
| Other                                | 402 (15.9%)                                                 | 9 (12.0%)                                                  | 29 (100.0%)                                          |
| <b>History of incarceration</b>      |                                                             |                                                            |                                                      |
| No                                   | 2273 (89.9%)                                                | 71 (94.7%)                                                 | 29 (100.0%)                                          |
| Yes                                  | 254 (10.1%)                                                 | 4 (5.3%)                                                   | 0 (0.0%)                                             |
| Missing                              | 5                                                           | 0                                                          | 0                                                    |
| <b>Smoking history</b>               |                                                             |                                                            |                                                      |
| No                                   | 1156 (45.8%)                                                | 39 (52.0%)                                                 | 28 (96.6%)                                           |
| Yes                                  | 1368 (54.2%)                                                | 36 (48.0%)                                                 | 1 (3.4%)                                             |
| Missing                              | 8                                                           | 0                                                          | 0                                                    |
| <b>Excess alcohol use</b>            |                                                             |                                                            |                                                      |
| No                                   | 2103 (83.8%)                                                | 64 (87.7%)                                                 | 29 (100.0%)                                          |
| Yes                                  | 406 (16.2%)                                                 | 9 (12.3%)                                                  | 0 (0.0%)                                             |
| Missing                              | 23                                                          | 2                                                          | 0                                                    |
| <b>HIV positive status</b>           |                                                             |                                                            |                                                      |
| No                                   | 2270 (89.8%)                                                | 65 (86.7%)                                                 | 28 (96.6%)                                           |
| Yes                                  | 259 (10.2%)                                                 | 10 (13.3%)                                                 | 1 (3.4%)                                             |
| Missing                              | 3                                                           | 0                                                          | 0                                                    |
| <b>HCV Ab status</b>                 |                                                             |                                                            |                                                      |
| Seronegative                         | 2129 (88.3%)                                                | 64 (85.3%)                                                 | 18 (100.0%)                                          |

| <b>Characteristic</b>            | <b>Lfx + Bdq + Lzd + Cfz + Cs,<br/>N = 2532<sup>1</sup></b> | <b>Lfx + Bdq + Lzd + Cfz + Dlm,<br/>N = 75<sup>1</sup></b> | <b>Lfx + Dlm + Lzd + Cfz,<br/>N = 29<sup>1</sup></b> |
|----------------------------------|-------------------------------------------------------------|------------------------------------------------------------|------------------------------------------------------|
| Seropositive                     | 281 (11.7%)                                                 | 11 (14.7%)                                                 | 0 (0.0%)                                             |
| Missing                          | 122                                                         | 0                                                          | 11                                                   |
| Diabetes                         |                                                             |                                                            |                                                      |
| No                               | 2315 (91.5%)                                                | 71 (94.7%)                                                 | 29 (100.0%)                                          |
| Yes                              | 216 (8.5%)                                                  | 4 (5.3%)                                                   | 0 (0.0%)                                             |
| Missing                          | 1                                                           | 0                                                          | 0                                                    |
| Baseline SARS-CoV2 status        |                                                             |                                                            |                                                      |
| No                               | 1946 (96.0%)                                                | 66 (97.1%)                                                 | 24 (100%)                                            |
| Yes                              | 81 (4.0%)                                                   | 2 (2.9%)                                                   | 0 (0.0%)                                             |
| Missing                          | 505                                                         | 7                                                          | 5                                                    |
| Previous TB episode              |                                                             |                                                            |                                                      |
| No                               | 1903 (75.3%)                                                | 53 (70.7%)                                                 | 27 (93.1%)                                           |
| Yes                              | 624 (24.7%)                                                 | 22 (29.3%)                                                 | 2 (6.9%)                                             |
| Missing                          | 5                                                           | 0                                                          | 0                                                    |
| X-ray cavities                   |                                                             |                                                            |                                                      |
| No cavity                        | 1048 (41.4%)                                                | 40 (53.3%)                                                 | 25 (92.6%)                                           |
| Unilateral                       | 1048 (41.4%)                                                | 23 (30.7%)                                                 | 2 (7.4%)                                             |
| Bilateral                        | 433 (17.1%)                                                 | 12 (16.0%)                                                 | 0 (0.0%)                                             |
| Missing                          | 3                                                           | 0                                                          | 2                                                    |
| Baseline smear microscopy status |                                                             |                                                            |                                                      |
| Negative                         | 1013 (41.1%)                                                | 32 (44.4%)                                                 | 21 (91.3%)                                           |
| Positive                         | 1454 (58.9%)                                                | 40 (55.6%)                                                 | 2 (8.7%)                                             |
| Missing                          | 65                                                          | 3                                                          | 6                                                    |
| Baseline elevated AST/ALT        |                                                             |                                                            |                                                      |
| None                             | 1972 (78.0%)                                                | 68 (90.6%)                                                 | 25 (86.2%)                                           |
| Grade 1                          | 506 (20.0%)                                                 | 6 (8.0%)                                                   | 4 (13.8%)                                            |
| Grade 2                          | 44 (1.7%)                                                   | 1 (1.3%)                                                   | 0 (0.0%)                                             |
| Grade 3                          | 9 (0.4%)                                                    | 0 (0.0%)                                                   | 0 (0.0%)                                             |
| Grade 4                          | 1 (<0.1%)                                                   | 0 (0.0%)                                                   | 0 (0.0%)                                             |
| Baseline peripheral neuropathy   |                                                             |                                                            |                                                      |
| None                             | 2389 (94.4%)                                                | 68 (90.7%)                                                 | 29 (100.0%)                                          |

| <b>Characteristic</b>             | <b>Lfx + Bdq + Lzd + Cfz + Cs,<br/>N = 2532<sup>1</sup></b> | <b>Lfx + Bdq + Lzd + Cfz + Dlm,<br/>N = 75<sup>1</sup></b> | <b>Lfx + Dlm + Lzd + Cfz,<br/>N = 29<sup>1</sup></b> |
|-----------------------------------|-------------------------------------------------------------|------------------------------------------------------------|------------------------------------------------------|
| Grade 1                           | 114 (4.5%)                                                  | 6 (8.0%)                                                   | 0 (0.0%)                                             |
| Grade 2                           | 24 (0.9%)                                                   | 1 (1.3%)                                                   | 0 (0.0%)                                             |
| Grade 3                           | 5 (0.2%)                                                    | 0 (0.0%)                                                   | 0 (0.0%)                                             |
| Grade 4                           | 0 (0.0%)                                                    | 0 (0.0%)                                                   | 0 (0.0%)                                             |
| <b>Baseline anaemia</b>           |                                                             |                                                            |                                                      |
| None                              | 2056 (81.2%)                                                | 69 (92.0%)                                                 | 27 (93.1%)                                           |
| Grade 1                           | 295 (11.7%)                                                 | 3 (4.0%)                                                   | 2 (6.9%)                                             |
| Grade 2                           | 156 (6.2%)                                                  | 3 (4.0%)                                                   | 0 (0.0%)                                             |
| Grade 3                           | 23 (0.9%)                                                   | 0 (0.0%)                                                   | 0 (0.0%)                                             |
| Grade 4                           | 2 (<0.1%)                                                   | 0 (0.0%)                                                   | 0 (0.0%)                                             |
| <b>Baseline renal dysfunction</b> |                                                             |                                                            |                                                      |
| None                              | 2403 (94.9%)                                                | 71 (94.7%)                                                 | 29 (100.0%)                                          |
| Grade 1                           | 126 (5.0%)                                                  | 3 (4.0%)                                                   | 0 (0.0%)                                             |
| Grade 2                           | 2 (<0.1%)                                                   | 1 (1.3%)                                                   | 0 (0.0%)                                             |
| Grade 3                           | 1 (<0.1%)                                                   | 0 (0.0%)                                                   | 0 (0.0%)                                             |
| Grade 4                           | 0 (0.0%)                                                    | 0 (0.0%)                                                   | 0 (0.0%)                                             |
| <b>Baseline visual loss</b>       |                                                             |                                                            |                                                      |
| None                              | 1935 (76.4%)                                                | 59 (78.7%)                                                 | 28 (96.6%)                                           |
| Grade 1                           | 172 (6.8%)                                                  | 8 (10.7%)                                                  | 1 (3.4%)                                             |
| Grade 2                           | 232 (9.2%)                                                  | 5 (6.7%)                                                   | 0 (0.0%)                                             |
| Grade 3                           | 130 (5.1%)                                                  | 3 (4.0%)                                                   | 0 (0.0%)                                             |
| Grade 4                           | 63 (2.5%)                                                   | 0 (0.0%)                                                   | 0 (0.0%)                                             |

Data are median (IQR), n (%); AFB=acid fast bacilli; ALT=alanine aminotransferase; AST=aspartate aminotransferase; Bdq=bedaquiline; Cfz=clofazimine; Cs=cycloserine; Dlm=delamanid; HCV Ab=Hepatitis C virus antibody; Lfx=levofloxacin; Lzd=linezolid; HIV=human immunodeficiency virus.

**Table 7. End of treatment outcomes by study regimen.**

|                   | <b>Total,<br/>N=2636</b> | <b>Lfx + Bdq + Lzd + Cfz + Cs,<br/>N = 2532</b> | <b>Lfx + Bdq + Lzd + Cfz + Dlm,<br/>N = 75</b> | <b>Lfx + Dlm + Lzd + Cfz,<br/>N = 29</b> |
|-------------------|--------------------------|-------------------------------------------------|------------------------------------------------|------------------------------------------|
| Cured             | 1649 (62.6%)             | 1606 (63.4%)                                    | 41 (54.7%)                                     | 2 (6.9%)                                 |
| Completed         | 532 (20.2%)              | 487 (19.2%)                                     | 20 (26.6%)                                     | 25 (86.2%)                               |
| Failed            | 191 (7.2%)               | 184 (7.3%)                                      | 5 (6.7%)                                       | 2 (6.9%)                                 |
| Died              | 113 (4.3%)               | 110 (4.3%)                                      | 3 (4.0%)                                       | 0 (0%)                                   |
| Lost to follow-up | 150 (5.7%)               | 144 (5.7%)                                      | 6 (8.0%)                                       | 0 (0%)                                   |
| Missing           | 1                        | 1                                               | 0                                              | 0                                        |
| Treatment success | 2181 (82.7%)             | 2093 (82.7%)                                    | 61 (81.3%)                                     | 27 (93.1%)                               |

Bdq=bedaquiline; Cfz=clofazimine; Cs=cycloserine; Dlm=delamanid; Lfx=levofloxacin; Lzd=linezolid.

**Table 8. Reasons for treatment failure with mSTR.**

| <b>Reasons for treatment failure</b>                | <b>N = 191<sup>1</sup></b> |
|-----------------------------------------------------|----------------------------|
| Adverse drug reaction resulting in treatment change | 32 (24.0%)                 |
| Treatment extended by clinician                     | 31 (23.3%)                 |
| Insufficient treatment received in accepted time    | 24 (18.0%)                 |
| Failure to culture convert                          | 16 (12.0%)                 |
| Acquired drug resistance                            | 11 (8.3%)                  |
| Clinical deterioration                              | 11 (8.3%)                  |
| Culture reverted                                    | 8 (6.0%)                   |
| Unknown                                             | 58                         |
| <sup>1</sup> n (%)                                  |                            |

**Table 9. End of treatment outcomes for all participants by baseline HIV status.**

| End of treatment outcome | HIV status                         |                                   |
|--------------------------|------------------------------------|-----------------------------------|
|                          | Negative,<br>N = 2363 <sup>1</sup> | Positive,<br>N = 270 <sup>1</sup> |
| Cured                    | 1548 (65.5%)                       | 100 (37.2%)                       |
| Completed                | 444 (18.8%)                        | 87 (32.3%)                        |
| Failed                   | 166 (7.0%)                         | 24 (8.9%)                         |
| Died                     | 84 (3.6%)                          | 29 (10.8%)                        |
| Lost to follow-up        | 121 (5.1%)                         | 29 (10.8%)                        |
| Missing                  | 0                                  | 1                                 |
| Treatment success        | 1992 (84.3%)                       | 187 (69.3%)                       |

<sup>1</sup>n (%); HIV= human immunodeficiency virus.

**Table 10. Crude associations between baseline HIV treatment and CD4 count and time to unsuccessful study outcome and time to death in the treatment cohort.**

| Characteristic          | Unsuccessful study outcome |         |      |            |         | Death |         |      |            |         |
|-------------------------|----------------------------|---------|------|------------|---------|-------|---------|------|------------|---------|
|                         | N                          | Event N | HR   | 95% CI     | p-value | N     | Event N | HR   | 95% CI     | p-value |
| Baseline ART status     | 268                        |         |      |            |         | 268   |         |      |            |         |
| No                      |                            | 16      | —    | —          |         |       | 9       | —    | —          |         |
| Yes                     |                            | 78      | 0.63 | 0.37, 1.09 | 0.10    |       | 30      | 0.43 | 0.20, 0.90 | 0.026   |
| Receiving cotrimoxazole | 262                        |         |      |            |         | 262   |         |      |            |         |
| Yes                     |                            | 88      | —    | —          |         |       | 36      | —    | —          |         |
| No                      |                            | 5       | 2.69 | 1.09, 6.63 | 0.032   |       | 3       | 3.80 | 1.17, 12.4 | 0.027   |
| Baseline CD4 group      | 245                        |         |      |            |         | 245   |         |      |            |         |
| 0-100                   |                            | 32      | —    | —          |         |       | 18      | —    | —          |         |
| 101-250                 |                            | 31      | 1.25 | 0.76, 2.06 | 0.37    |       | 12      | 0.85 | 0.41, 1.76 | 0.66    |
| 251-500                 |                            | 15      | 0.67 | 0.36, 1.24 | 0.2     |       | 3       | 0.23 | 0.07, 0.79 | 0.019   |
| 500+                    |                            | 6       | 0.40 | 0.17, 0.96 | 0.040   |       | 2       | 0.23 | 0.05, 0.99 | 0.048   |

HR = Hazard Ratio; CI = Confidence Interval; HIV=human immunodeficiency virus; ART=antiretroviral therapy.
